# Supplementary material for: BLOC-1 and BLOC-3 regulate VAMP7 cycling to and from melanosomes via distinct tubular transport carriers
Source: PubMed Central journal article supplement — J Cell Biol. 2016 Aug 1;214(3):293–308. doi: 10.1083/jcb.201605090 (PMC4970331; doi:10.1083/jcb.201605090), 2016-08-01
Supplement: JCB_201605090_sm.pdf [file JCB_201605090_sm.pdf]

Dennis et al., <http://www.jcb.org/cgi/content/full/jcb.201605090/DC1>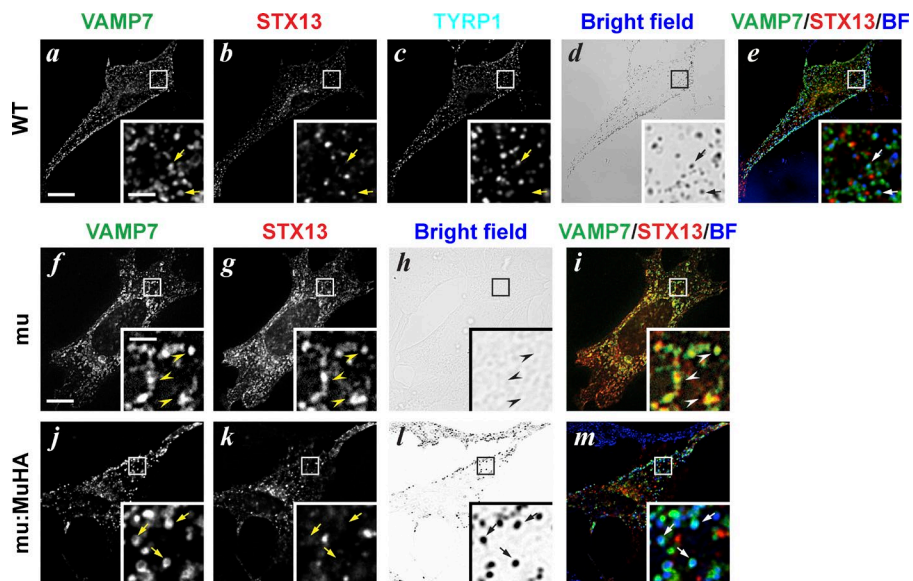

Figure S1. **VAMP7 is a BLOC-1 cargo.** WT melan-Ink4a (a–e), BLOC-1-deficient melan-mu (mu; f–i), or melan-mu melanocytes stably expressing Muted-HA (mu:muHA; j–m) were transiently transfected to express GFP-VAMP7 (green) and mCh-STX13 (red), fixed 24 h later, and analyzed by deconvolution immuno-FM. BF images in d, h, and l are pseudocolored blue in merged images e, i, and m. In a–e, cells were also immunolabeled for TYRP1 with Alexa Fluor 647 secondary antibody (cyan; not included in merge). Insets are boxed regions magnified five times. Arrows show melanosomes with GFP-VAMP7 (and TYRP1 in a–e) but lacking mCh-STX13. Arrowheads show GFP-VAMP7 retained in mCh-STX13-positive endosomes. Bars: (main) 10  $\mu$ m; (insets) 2  $\mu$ m.

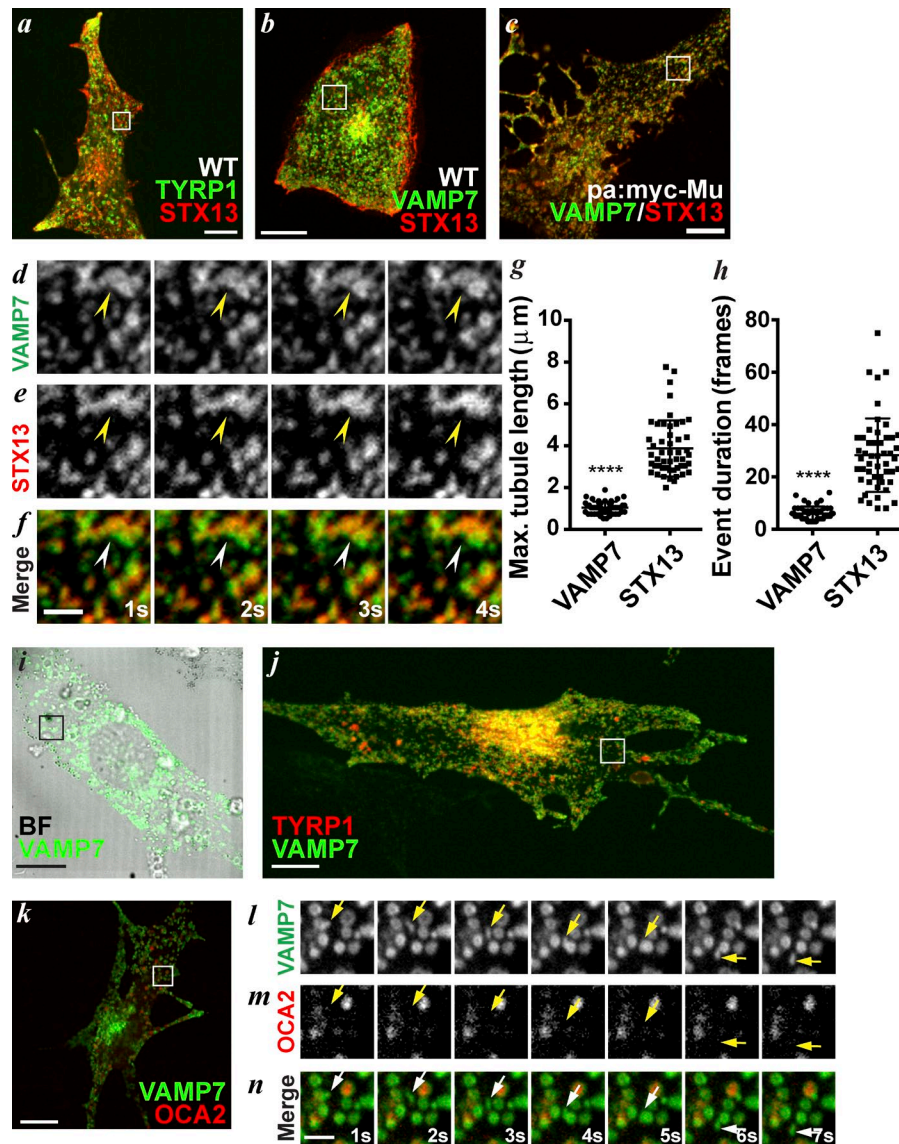

Figure S2. **VAMP7-containing tubules are distinct from anterograde STX13-containing tubules and lack melanosomal cargoes TYRP1 and OCA2, and VAMP7 requires BLOC-1 to exit from endosomes.** (a and b) WT melan-Ink4a cells transiently cotransfected with mCh-STX13 (red) and either TYRP1-GFP (a) or GFP-VAMP7 (b; green) were analyzed 24 h later by spinning-disk confocal microscopy. Shown are single frames of a whole cell with region of interest corresponding to images in Fig. 4 (a–c in panel a; and d–f in panel b). Bars, 10  $\mu\text{m}$ . (c–f) BLOC-1-deficient melan-pa melanocytes transiently transfected with myc-Muted (pa:myc-Mu; “mock rescue”), mCh-STX13 (STX13, red), and GFP-VAMP7 (VAMP7, green) were analyzed 24 h later by spinning-disk confocal microscopy at  $\sim 1$  fps. (c) Single frame of a representative cell showing overlap of mCh-STX13 with GFP-VAMP7. Bar, 10  $\mu\text{m}$ . (d–f) Image sequences from the boxed region in c are magnified 3.5 times. Arrowheads indicate mCh-STX13-labeled endosomes containing GFP-VAMP7. Elapsed time is indicated (in seconds) at the lower right. Bar, 2  $\mu\text{m}$ . (g and h) Quantification of length (g) and stability (h) of VAMP7- and STX13-labeled tubules in WT melanocytes. WT melan-Ink4a cells transiently cotransfected with mCh-STX13 and GFP-VAMP7 were analyzed 24 h later by spinning-disk microscopy. For at least 50 tubules labeled by each protein, the maximum tubule length and number of frames (captured at  $\sim 1$  fps) in which a given tubule was visible were manually quantified using ImageJ. Individual data points are plotted on a dot plot with mean  $\pm$  SD indicated. \*\*\*\*,  $P < 0.0001$ . (i–n) WT melan-Ink4a melanocytes transiently transfected with GFP-VAMP7 (green) alone (i) or with either TYRP1-mRFP (j) or mRFP-OCA2 (k–n; red) were analyzed 24 h (i–j) or 48 h (k–n) later by spinning-disk confocal microscopy at  $\sim 1$  fps. (i and j) Single frame from whole cells with ROI corresponding to images in Fig. 5 (a–c in panel i; and h–j in panel j). Bars, 10  $\mu\text{m}$ . (k) Single frame of representative cell showing overlap of GFP-VAMP7 with mRFP-OCA2. Bar, 10  $\mu\text{m}$ . (l–n) Image sequences from the boxed region in k are magnified 3.5 times. Arrows, a GFP-VAMP7-labeled tubule exits from an mRFP-OCA2- and GFP-VAMP7-labeled melanosome. Elapsed time is indicated (in seconds) at the lower right. Bar, 2  $\mu\text{m}$ .

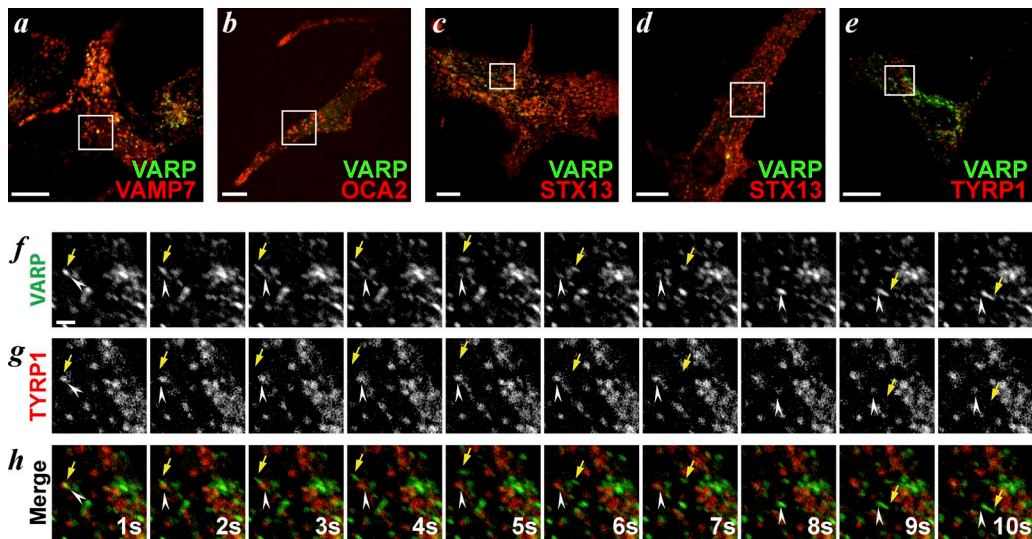

Figure S3. **VARP departs TYRP1-labeled melanosomes in VAMP7-labeled tubules.** WT melan-Ink4a cells transiently transfected with VARP-GFP (green) and either mCh-VAMP7 (a), mRFP-OCA2 (b), mCh-STX13 (c and d), or TYRP1-mRFP (e-h; red) were analyzed 48 h later by spinning-disk confocal microscopy at  $\sim 1$  fps. Bars, 10  $\mu\text{m}$ . (a-e) Single frame from whole cells with regions of interest corresponding to images in Fig. 6 (j-l in panel a; m-o in panel b; p-r in panel c; or s-u in panel d). (e-h) Single frame (e) and image sequence from boxed region in the periphery (f-h; magnified 3.5 times) of a representative cell showing localization of VARP-GFP (green) relative to TYRP1-mRFP (red). Arrows show a VARP-GFP-labeled tubule departs from a TYRP1-mRFP-labeled melanosome (at arrowhead). Elapsed time is indicated (in seconds) at the lower right. Bars: (a-e) 10  $\mu\text{m}$ ; (f-h) 2  $\mu\text{m}$ .

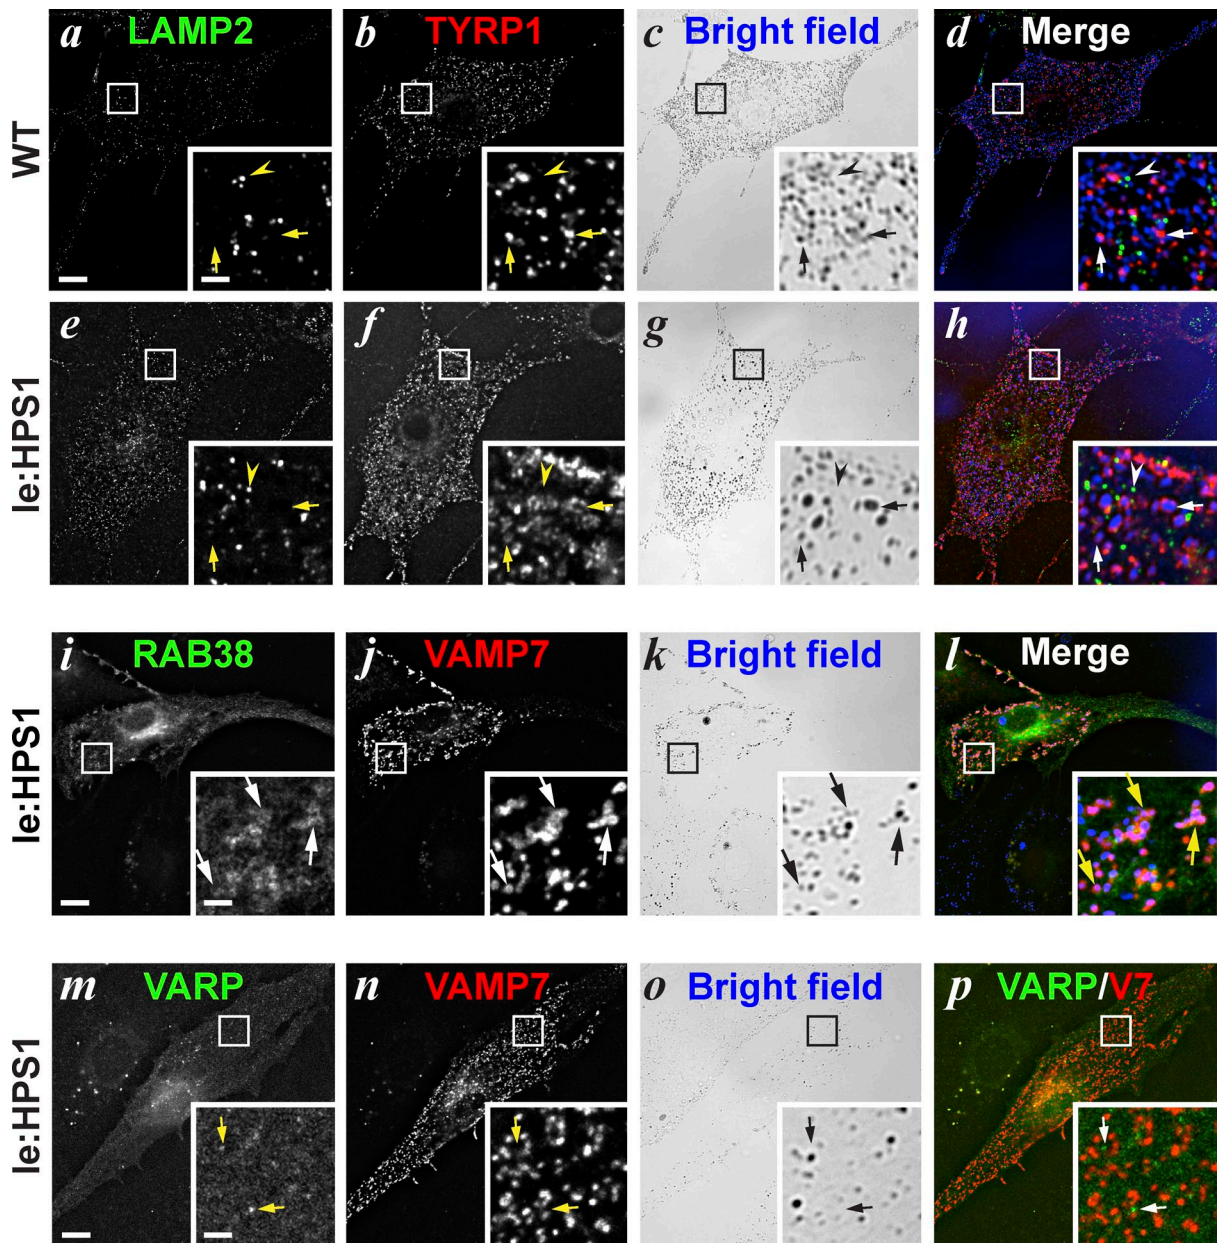

Figure S4. **VAMP7 and TYRP1, but not RAB38 and VARP, localize normally to melanosomes in mock-rescued BLOC-3-deficient *light ear* melanocytes.** WT melan-Ink4a melanocytes (a–d), and melan-le cells stably expressing HA-HPS1 (le:HPS1 or “mock rescued”, e–h) were fixed and immunolabeled for LAMP2 (green) and TYRP1 (red) and analyzed by deconvolution immuno-FM. BF images in c and g are pseudocolored blue in the merged images (d and h). Insets are boxed regions magnified five times. Bars: (main) 10  $\mu$ m; (insets) 2  $\mu$ m. (i–p) Mock-rescued melan-le cells stably expressing HA-HPS1 (le:HPS1) transiently transfected with mCh-VAMP7 (red) and either GFP-RAB38 (i–l) or VARP-GFP (m–p; green) were fixed 24 h (i–l) or 48 h (m–p) after transfection and analyzed by deconvolution immuno-FM. BF images in k and o are pseudocolored blue in the merged images (l and p). Insets are boxed regions magnified five times. Bars: (main) 10  $\mu$ m; (insets) 2  $\mu$ m. (i–l) Arrows show mCh-VAMP7–labeled melanosomes lacking GFP-RAB38. (m–p) Arrows show VARP-GFP puncta not associated with melanosomes.

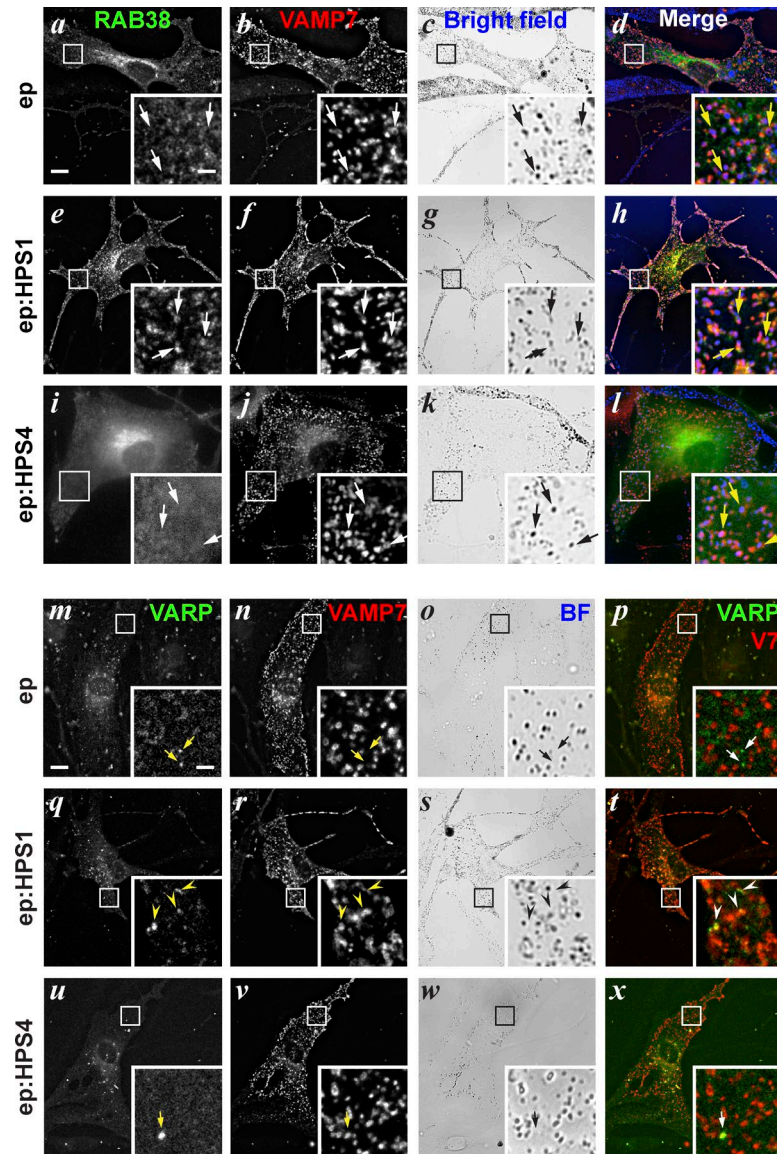

Figure S5. **HPS1-deficient melan-ep melanocytes are phenotypically similar to HPS4-deficient melan-le cells.** BLOC-3-deficient melan-ep (ep, HPS1-deficient, a–d and m–p) and melan-ep cells stably expressing either HA-HPS1 (ep:HPS1 or “rescued”, e–h and q–t) or HA-HPS4 (ep:HPS4 or “mock rescued”, i–l and u–x) and transiently expressing mCh-VAMP7 (red) and either GFP-RAB38 (a–l) or VARP-GFP (m–x; green) were fixed and analyzed by deconvolution immuno-FM. BF images in c, g, and k are pseudocolored blue in the merged images in d, h, and l. Insets are boxed regions magnified five times (all panels except i–l) or three times (i–l). Bars: (main) 10  $\mu$ m; (insets) 2  $\mu$ m. (a–l) Arrows point to mCh-VAMP7-labeled melanosomes. Note minimal localization of GFP-RAB38 to melanosomes except in “rescued” ep:HPS1 cells. (m–x) Arrows point to VARP-GFP puncta not associated with melanosomes, and arrowheads show VARP-GFP puncta associated with mCh-VAMP7-labeled melanosomes.

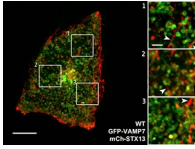

**Video 1. GFP-VAMP7 and mCh-STX13 label separate tubule populations in WT melanocytes.** A WT melan-Ink4a melanocyte transiently expressing GFP-VAMP7 (green) and mCh-STX13 (red) was imaged by spinning-disk confocal microscopy 24 h after transfection. Images were acquired at  $\sim 1$  fps. (left) 60 frames of whole cell with boxes corresponding to regions of interest in Fig. 5 (d–g). (right) 30 frames of magnified insets of boxes. White arrowheads show mCh-STX13-labeled tubules, and yellow arrows show GFP-VAMP7-labeled tubules. Video plays at 5 $\times$  real time. Bars: (main) 10  $\mu$ m; (insets) 2  $\mu$ m.

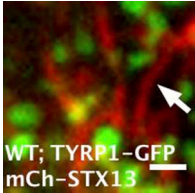

**Video 2. The melanosomal cargo TYRP1-GFP is not enriched in mCh-STX13 tubules in WT melanocytes.** A WT melan-Ink4a melanocyte transiently expressing TYRP1-GFP (green) and mCh-STX13 (red) was imaged by spinning-disk confocal microscopy 24 h after transfection. Video is taken from the same cell shown in Fig. 4 (a–c). Images were acquired at  $\sim 1$  fps. Arrows show mCh-STX13 tubules lacking TYRP1-GFP. Video plays at 5 $\times$  real time. Bar, 1  $\mu$ m.

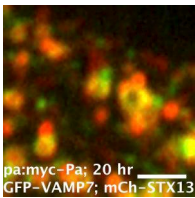

**Video 3. GFP-VAMP7 traffics to melanosomes via BLOC-1-dependent STX13 tubules.** A BLOC-1-deficient melan-pa melanocyte transiently transfected with myc-Pallidin (to rescue BLOC-1 activity), GFP-VAMP7 (green), and mCh-STX13 (red) was imaged by spinning-disk confocal microscopy 20 h after transfection. Images were acquired at  $\sim 1$  fps. Arrow shows a tubule containing both GFP-VAMP7 and mCh-STX13. Frames from a video of a different cell are shown in Fig. 4 (g–j). Note the presence of mCh-STX13 tubules dependent on BLOC-1 function (compare to Video 5) and visualization of GFP-VAMP7 trafficking through mCh-STX13 tubules, which is undetectable in WT melanocytes (compare to Video 1). Video plays at 5 $\times$  real time. Bar, 2  $\mu$ m.

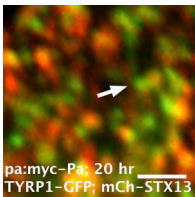

**Video 4. TYRP1-GFP traffics to melanosomes via BLOC-1-dependent STX13 tubules.** A BLOC-1-deficient melan-pa melanocyte transiently transfected with myc-Pallidin (to rescue BLOC-1 activity), TYRP1-GFP (green), and mCh-STX13 (red) was imaged by spinning-disk confocal microscopy 20 h after transfection. Images were acquired at  $\sim 1$  fps. Arrows show tubules containing both TYRP1-GFP and mCh-STX13. The video corresponds to the same region shown in Fig. 4 (k–n). Note the presence of mCh-STX13 tubules that are dependent on BLOC-1 function (compare to Video 5) and the presence of TYRP1-GFP in mCh-STX13-labeled tubules, which is undetectable in WT melanocytes (compare to Video 2). Video plays at 5 $\times$  real time. Bar, 2  $\mu$ m.

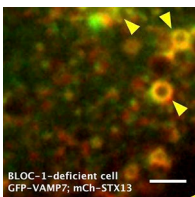

**Video 5. BLOC-1-deficient melanocytes lack STX13-labeled endosomal tubules and retain GFP-VAMP7 and mCh-STX13 in endosomes.** A BLOC-1-deficient melan-pa melanocyte transiently expressing GFP-VAMP7 (green) and mCh-STX13 (red) was imaged by spinning-disk confocal microscopy 24 h after transfection. Images were acquired at  $\sim 1$  fps. Yellow arrowheads show enlarged endosomes containing both GFP-VAMP7 and mCh-STX13. Note the reduced mCh-STX13 tubulation from endosomes compared with WT melan-Ink4a melanocytes (Videos 1 and 2). Frames from a different video are shown in Fig. S2 (c–f). Video plays at 5 $\times$  real time. Bar, 2  $\mu$ m.

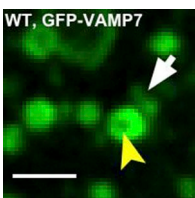

**Video 6. GFP-VAMP7-labeled tubules exit pigmented melanosomes.** A WT melan-Ink4a melanocyte transiently expressing GFP-VAMP7 (green) was imaged by spinning-disk confocal microscopy 24 h after transfection. Images were acquired at  $\sim 1$  fps. The region shown corresponds to Fig. 5 (a–c) and Fig. S2 i. Yellow arrowhead indicates the position of a pigmented melanosome as viewed by BF microscopy (see Fig. 5 b); white arrow, GFP-VAMP7 tubule extending from and leaving the melanosome. Video plays at 5 $\times$  real time. Bar, 2  $\mu$ m.

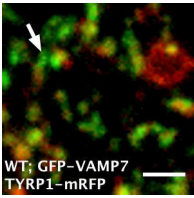

Video 7. **TYRP1-mRFP is undetectable in GFP-VAMP7 tubules leaving melanosomes.** A WT melan-Ink4a melanocyte transiently expressing GFP-VAMP7 (green) and TYRP1-mRFP (red) was imaged by spinning-disk confocal microscopy 24 h after transfection. Images were acquired at  $\sim 1$  fps. The region shown corresponds to Fig. 5 (h–j) in the cell shown in Fig. S2 j. The arrow shows a GFP-VAMP7 tubule leaving a TYRP1-mRFP- and GFP-VAMP7-positive melanosome. Video plays at 5 $\times$  real time. Bar, 2  $\mu$ m.

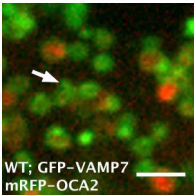

Video 8. **mRFP-OCA2 is undetectable in GFP-VAMP7 tubules leaving melanosomes.** A WT melan-Ink4a melanocyte transiently expressing GFP-VAMP7 (green) and mRFP-OCA2 (red) was imaged by spinning-disk confocal microscopy 48 h after transfection. Images were acquired at  $\sim 1$  fps. The region shown corresponds to Fig. S2 (k–n). Arrow, GFP-VAMP7 tubule leaving an mRFP-OCA2- and GFP-VAMP7-positive melanosome. Video plays at 5 $\times$  real time. Bar, 2  $\mu$ m.

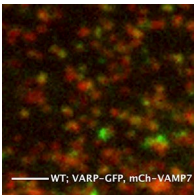

Video 9. **mCh-VAMP7 tubules are also labeled by VARP-GFP.** A WT melan-Ink4a melanocyte transiently expressing VARP-GFP (green) and mCh-VAMP7 (red) was imaged at  $\sim 1.4$  fps by spinning-disk confocal microscopy 48 h after transfection. A Hamamatsu ORCA-Flash4.0 sCMOS camera on the PerkinElmer spinning-disk confocal was used to acquire this image sequence. Arrow shows a tubule labeled by both VARP-GFP and mCh-VAMP7 that extends and departs from an mCh-VAMP7-labeled melanosome. Frames from a different video are shown in Fig. 6 (j–l) in the cell shown in Fig. S3 a. Video plays at 5 $\times$  real time. Bar, 2  $\mu$ m.

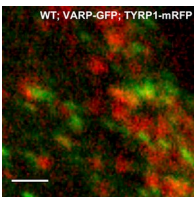

Video 10. **TYRP1-mRFP is undetectable in VARP-GFP-labeled tubules.** A WT melan-Ink4a melanocyte transiently expressing VARP-GFP (green) and TYRP1-mRFP (red) was imaged by spinning-disk confocal microscopy 48 h after transfection. Images were acquired at  $\sim 1$  fps. The region shown corresponds to Fig. S3 (e–h). Arrows show tubules labeled by VARP-GFP but lacking TYRP1-mRFP that extend and depart from VARP-GFP- and TYRP1-mRFP-labeled melanosomes. Video plays at 5 $\times$  real time. Bar, 2  $\mu$ m.

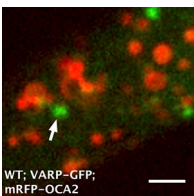

Video 11. **mRFP-OCA2 is undetectable in VARP-GFP-labeled tubules.** A WT melan-Ink4a melanocyte transiently expressing VARP-GFP (green) and mRFP-OCA2 (red) was imaged by spinning-disk confocal microscopy 48 h after transfection. Images were acquired at  $\sim 1$  fps. The region shown corresponds to Fig. 6 (m–o) in the cell shown in Fig. S3 b. The arrow shows a tubule labeled by VARP-GFP but lacking mRFP-OCA2 extends and departs from a VARP-GFP- and mRFP-OCA2-labeled melanosome. Video plays at 5 $\times$  real time. Bar, 2  $\mu$ m.

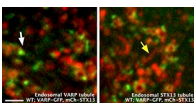

Video 12. **VARP-GFP labels tubules that originate from STX13-labeled endosomes but lack STX13.** A WT melan-Ink4a melanocyte transiently expressing VARP-GFP (green) and mCh-STX13 (red) was imaged by spinning-disk confocal microscopy 48 h after transfection. Images were acquired at  $\sim 1$  fps. (left) a VARP-GFP-labeled tubule (white arrow) lacking mCh-STX13 extends and departs from a mCh-STX13-positive endosome. Note the longer and more stable tubule dynamics relative to VARP-GFP-labeled tubules that emerge from melanosomes (in Videos 9, 10, and 11). (right) An mCh-STX13-labeled tubule lacking VARP-GFP (yellow arrow) extends from a mCh-STX13- and GFP-VARP-labeled endosome. The video corresponds to Fig. 6 (p–r); both panels are taken from the cell shown in Fig. 6 (p–r) and Fig. S3 c, and the video plays at 5 $\times$  real time. Bar, 2  $\mu$ m.

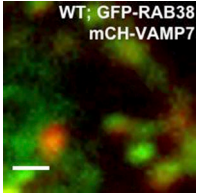

Video 13. **GFP-RAB38 is present on mCh-VAMP7-containing recycling tubules.** A WT melan-Ink4a melanocyte transiently expressing GFP-RAB38 (green) and mCh-VAMP7 (red) was imaged by spinning-disk confocal microscopy 24 h after transfection. Images were acquired at  $\sim 1$  fps. White arrows, tubules labeled by both GFP-RAB38 and mCh-VAMP7 extend and depart from a GFP-RAB38- and mCh-VAMP7-labeled melanosome. The video corresponds to Fig. 7 (i–l) and plays at 5x real time. Bar, 1  $\mu\text{m}$ .

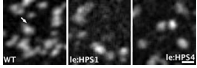

Video 14. **Example of regions of interest used in quantification of GFP-VAMP7 tubules departing melanosomes in WT, BLOC-3-deficient, and BLOC-3 “rescue” cells.** A WT melan-Ink4a (WT; left), a BLOC-3-deficient “mock rescue” (le:HPS1; middle), and a “rescued” melan-le (le:HPS4; right) melanocyte each transiently expressing GFP-VAMP7 was imaged by spinning-disk confocal microscopy 24 h after transfection. Images were acquired at  $\sim 1$  fps. White arrows, GFP-VAMP7-labeled tubules depart from melanosomes. The video corresponds to the regions shown in panels a–c of Fig. 10 and quantified in Fig. 10 d, and it plays at 5x real time. Bar, 1  $\mu\text{m}$ .
